# Supplementary material for: Hollow and porous palladium nanocrystals: synthesis and electrocatalytic application
Source: Royal Society of Chemistry journal article supplement (doi:10.1039/c5ta07188g), 2015-01-01
Supplement: c5ta07188g1.pdf [file c5ta07188g1.pdf]

## Supporting Information

### **Hollow and porous palladium nanocrystals: synthesis and electrocatalytic application**

Gengtao Fu,<sup>a‡</sup> Mingxing Gong,<sup>a‡</sup> Yawen Tang,<sup>a\*</sup> Lin Xu,<sup>a</sup> Dongmei Sun<sup>a</sup> and Jong-Min Lee<sup>b\*</sup>

<sup>a</sup> Jiangsu Key Laboratory of New Power Batteries, Jiangsu Collaborative Innovation Center of Biomedical Functional Materials, School of Chemistry and Materials Science, Nanjing Normal University, Nanjing 210023, China

<sup>b</sup> School of Chemical and Biomedical Engineering, Nanyang Technological University, Singapore 637459, Singapore

\* Corresponding Authors: Jong-Min Lee, [jmlee@ntu.edu.sg](mailto:jmlee@ntu.edu.sg) (J.-M. Lee);

Yawen Tang, [tangyawen@njnu.edu.cn](mailto:tangyawen@njnu.edu.cn) (Y. W. Tang);

‡ Dr. G. T. Fu and M. X. Gong contributed equally to this work.

## **Experimental**

### **Reagents and Chemicals**

Palladium chloride ( $\text{PdCl}_2$ ), urea (carbamide), polyvinylpyrrolidone (PVP,  $M_w = 30000$ ) and methanol ( $\text{CH}_3\text{OH}$ ) were purchased from Sinopharm Chemical Reagent Co., Ltd. (Shanghai, China). Commercial Pd black was purchased from Johnson Matthey Corporation. All reagents were of analytical reagent grade and used without further purification.

### **Synthesis of Pd nanocrystals**

In a typical synthesis of Pd nanobowls (Pd-NBs), 0.5 mL of 0.05 M  $\text{PdCl}_2$  solution and 2.0 mL of 0.05 M urea were added into 7.5 mL deionized water with continuous ultrasonic for 10 minutes at room temperature. Then, 50 mg PVP ( $M_w = 30000$ ) was added into  $\text{PdCl}_2$ -urea mixture solution with another continuous ultrasonic for 10 minutes. After adjusting solution pH to 12.0 using NaOH solution, the resulting homogeneous solution was transferred to a 20 mL Teflon-lined stainless-steel autoclave. The stainless-steel autoclave was heated at 140 °C for 4 h. After cooling to room temperature, the products were separated by centrifugation at 15000 rpm for 15 min and further purified by washing with ethanol three times. The Pd nanocages (Pd-NCs) and solid Pd nanoparticles (Pd-SNPs) were obtained using the same process but with the lower pH at 8.0 and 2.0, respectively.

### **Electrochemical Measurements**

Prior to the electrochemical tests, all Pd nanocrystals were treated by UV irradiation (wavelength at 185 and 254 nm) in air for 4 h to further remove the capping agents.<sup>1-4</sup> After UV irradiation, the morphology and size of the various Pd nanocrystals still remained, as demonstrated by the TEM images (Figure S15). All electrochemical experiments were performed using a CHI 760 D electrochemical analyzer at  $30 \pm 1$  °C. A standard three-electrode system was used for all electrochemical experiments, which consisted of a platinum wire as the auxiliary electrode, a saturated calomel reference electrode (SCE) protected by Luggin capillary with KCl solution as the reference electrode, and a catalyst modified glassy carbon electrode as the working electrode. Potentials in this study were reported with respect to the SCE.

An evenly distributed suspension of catalyst was prepared by ultrasonic the mixture of 10 mg catalyst and 5 mL H<sub>2</sub>O for 30 min, and 6  $\mu$ L of the resulting suspension was drop-cast onto the surface of the glassy carbon electrode. After drying at room temperature, 3  $\mu$ L of Nafion solution (5 wt. %) was covered on the modified electrode surface and allowed drying again. Thus, the working electrode was obtained, and the specific loading of metal on the electrode surface was about 170  $\mu$ g cm<sup>-2</sup>. Electrochemical measurements were conducted in N<sub>2</sub>-saturated 0.1 M NaOH solution or N<sub>2</sub>-saturated 0.1 M NaOH solution with 0.5 M CH<sub>3</sub>OH. The electrochemically active surface areas (ECSA) of Pd catalysts was calculated from the following equation ( $ECSA=Q/mC$ , m was the loading amount of Pd metal) by integrating the reduction charge (Q) of surface Pd(OH)<sub>2</sub> and assuming a value of 420  $\mu$ C cm<sup>-2</sup> (C) for the reduction charge of a Pd(OH)<sub>2</sub> monolayer on the Pd surface because ECSA of Pd catalysts could not be precisely assessed by coulometry in the “hydrogen region” due to the interference of hydrogen absorption in bulk Pd.

The The continuous CV measurements were conducted by continuously cycling the potential between -0.8 and 0.4 V (vs. SCE) in N<sub>2</sub>-saturated 0.1 M NaOH solution at a scan rate of 100 mV s<sup>-1</sup>. Meanwhile, full-scale voltammogram between -0.8 and 0.4 V (vs. SCE) in N<sub>2</sub>-saturated 0.1 M NaOH solution were recorded periodically to track the degradation of Pd electrocatalysts.

### **Characterization**

X-ray diffraction (XRD) patterns were obtained with a Model D/max-rC X-ray diffractometer using Cu Ka radiation source ( $\lambda=1.5406$  Å) and operating at 40 kV and 100 mA. X-ray photoelectron spectroscopy (XPS) measurements were carried out on a Thermo VG Scientific ESCALAB 250 spectrometer. The binding energy was calibrated by means of the C 1s peak energy of 284.6 eV. Transmission electron microscopy (TEM) images were taken using a JEOL JEM-2100F transmission electron microscopy operated at 200 kV. High-resolution TEM (HRTEM), high-angle annular dark-field scanning transmission electron microscopy (HAADF-STEM) measurements were performed on FEI Tecnai G2 F20 microscope equipped with an EDAX X-ray detector. Scanning electron microscopy (SEM) images were captured on a JSM-2010 microscope at an accelerating voltage of 20 kV. Nitrogen

adsorption–desorption isotherms (SADI) experiments were performed at 77 K on Micromeritics ASAP 2020MC instrument to determine the Brunauer–Emmett–Teller (BET) surface area and pore size distribution.

**Figure section**

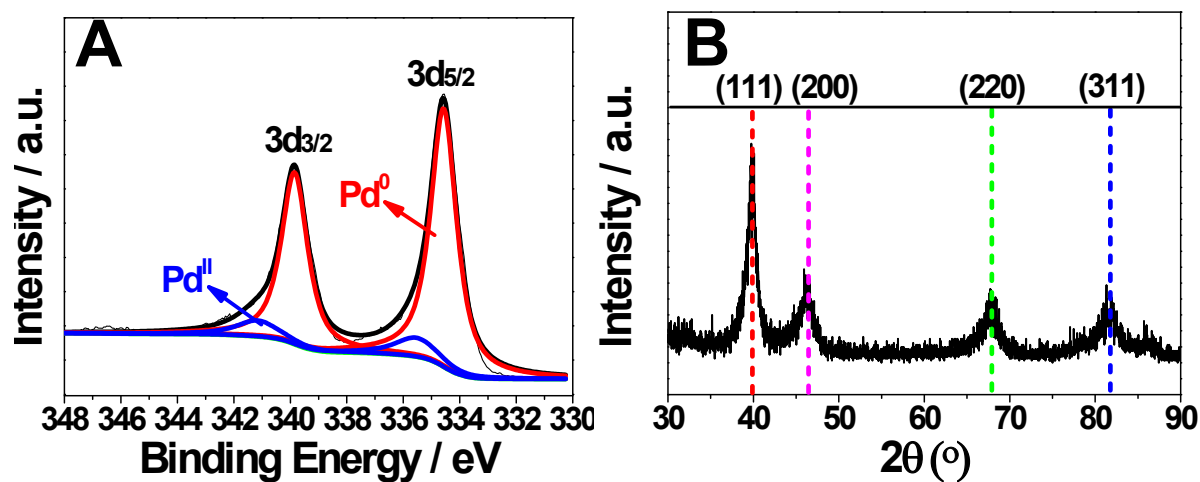

**Fig. S1** (A) Pd 3d XPS spectrum and (B) XRD pattern of Pd-NBs.

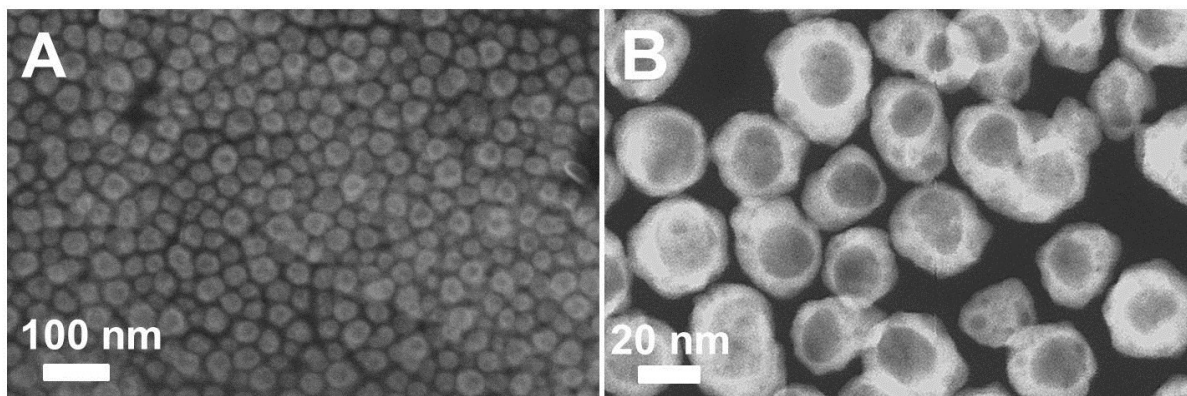

**Fig. S2** Typical SEM and HAADF-STEM images of Pd-NBs.

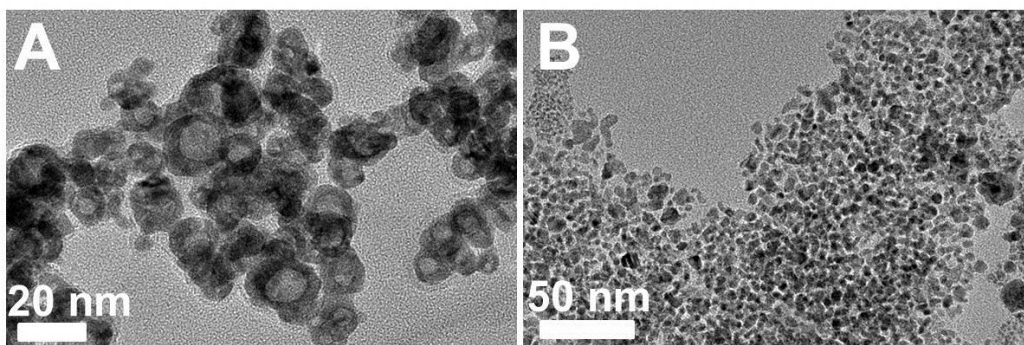

**Fig. S3** TEM images of obtained Pd nanocrystals under the standard procedures except (A) without PVP and (B) without urea.

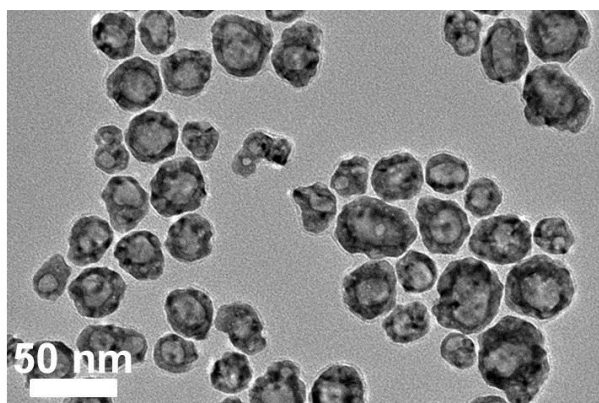

**Fig. S4** TEM image of Pd nanocrystals prepared by displacing the air with  $N_2$  to eliminate typical etchant  $O_2$ .

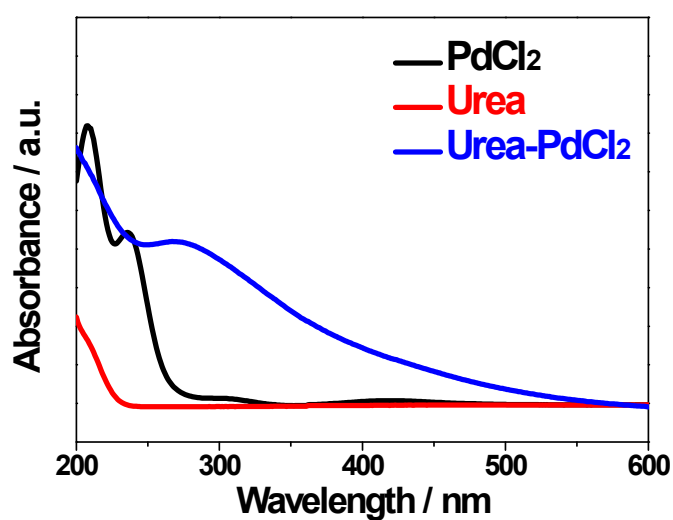

**Fig. S5** UV-vis spectra of  $PdCl_2$  solution, urea solution and the mixture solution of urea and  $PdCl_2$ .

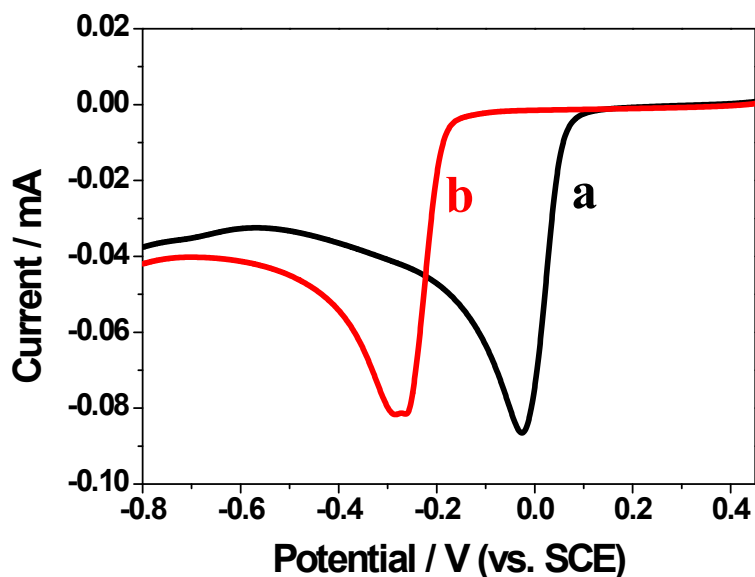

**Fig. S6** Linear sweeping voltammograms of N<sub>2</sub>-saturated 0.5 M KCl solution containing (a) 0.0025 M PdCl<sub>2</sub> (pH 2.0) and (b) 0.0025 M PdCl<sub>2</sub> + 0.4 M urea solution (pH 2.0) at the glassy carbon electrode at a scan rate of 100 mV s<sup>-1</sup>, respectively.

As observed, the reduction peak potential of mixture solution containing urea and PdCl<sub>2</sub> shows the negative shift compared with the single-component PdCl<sub>2</sub> solution, also confirming that the interaction between PdCl<sub>2</sub> and urea. For the kinetically controlled synthesis of noble metal nanocrystals, the slow reduction rate of the metal precursor is crucial for the generation of high-quality nanocrystals, because a fast reduction rate generally results in the aggregation of metal nanostructures. According to thermodynamical view, the lower reduction potential results in the slower reduction rate. Thus, the low reduction potential of the urea-Pd<sup>II</sup> complex facilitates the formation of the monodisperse Pd nanostructures, owing to the slow reduction rate.

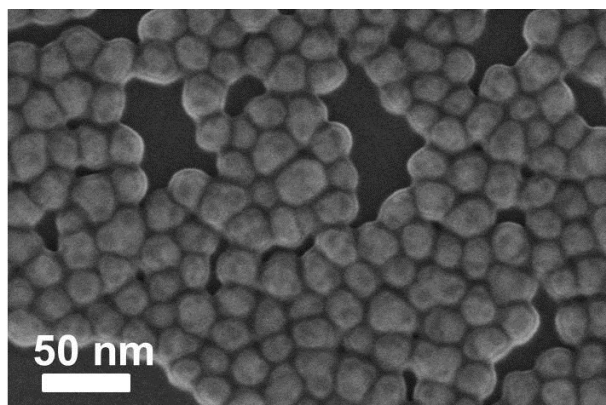

**Fig. S7** Typical SEM image of Pd-NCs.

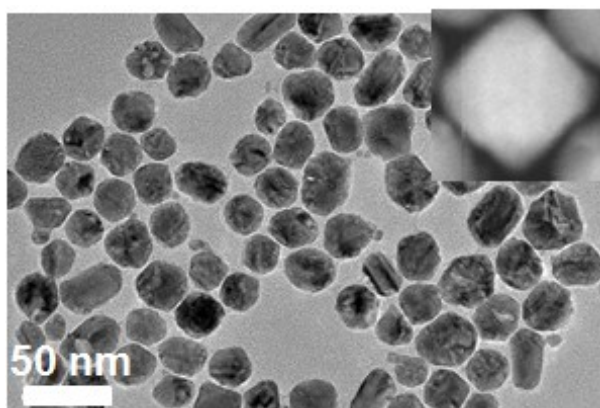

**Fig. S8** TEM image of Pd-SNPs, the insert is the corresponding HAADF-STEM image.



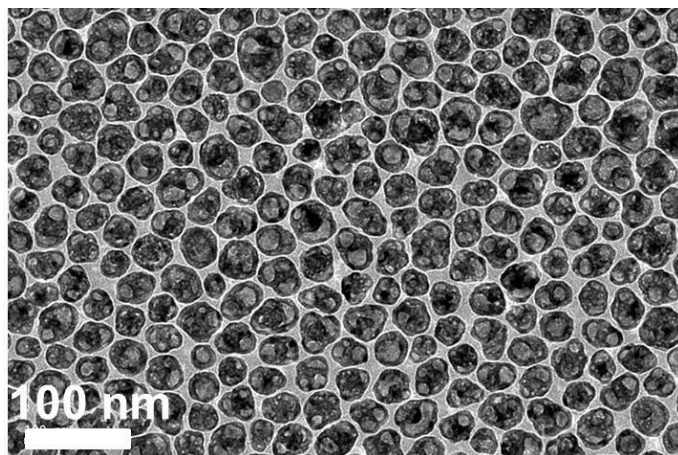

**Fig. S9** TEM image of Pd-NCs after re-heating treatment at 140 °C for 12 h.

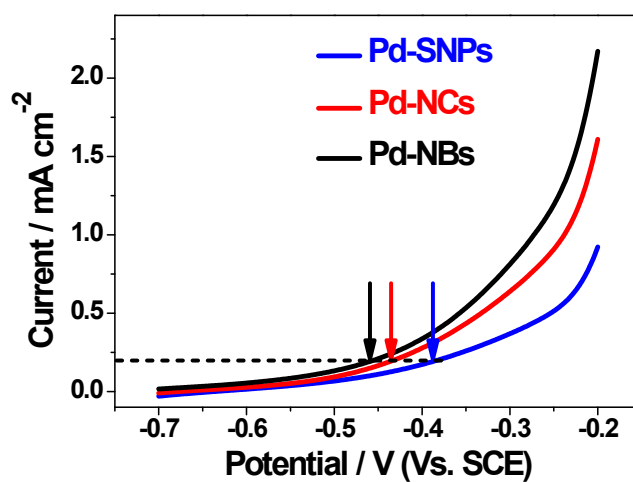

**Fig. S10** CVs at low potential region for Pd-NBs, Pd-NCs and Pd-SNPs in N<sub>2</sub>-saturated 0.1 M NaOH + 0.5 M CH<sub>3</sub>OH solution at the scan rate of 50 mV s<sup>-1</sup>.



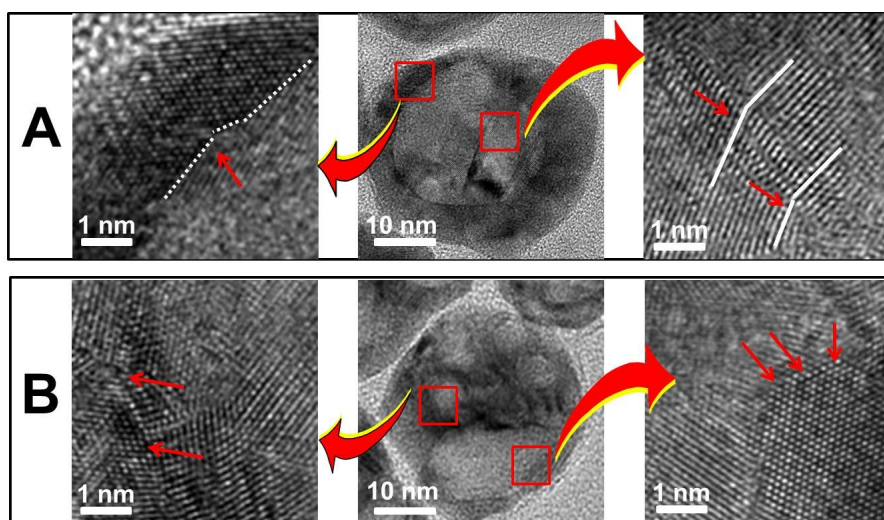

**Fig. S11** HRTEM images of the (A) Pd-NBs and (B) Pd-NCs.

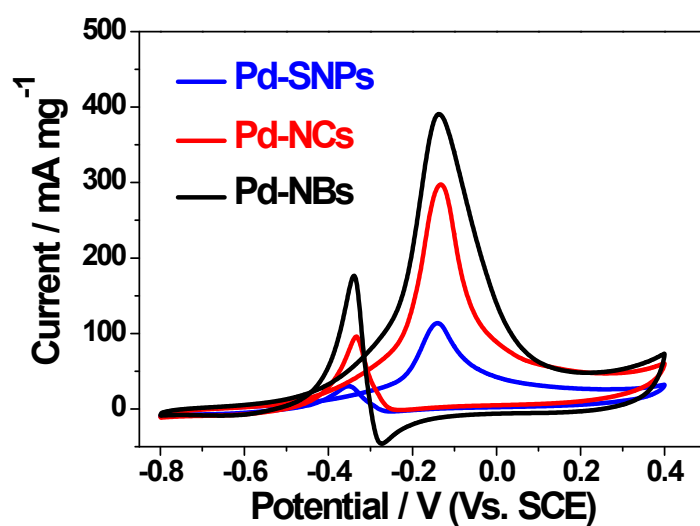

**Fig. S12** Mass-normalized CVs for the Pd-NBs, Pd-NCs, and Pd-SNPs in N<sub>2</sub>-saturated 0.1 M NaOH + 0.5 M CH<sub>3</sub>OH solution at the scan rate of 50 mV s<sup>-1</sup>.

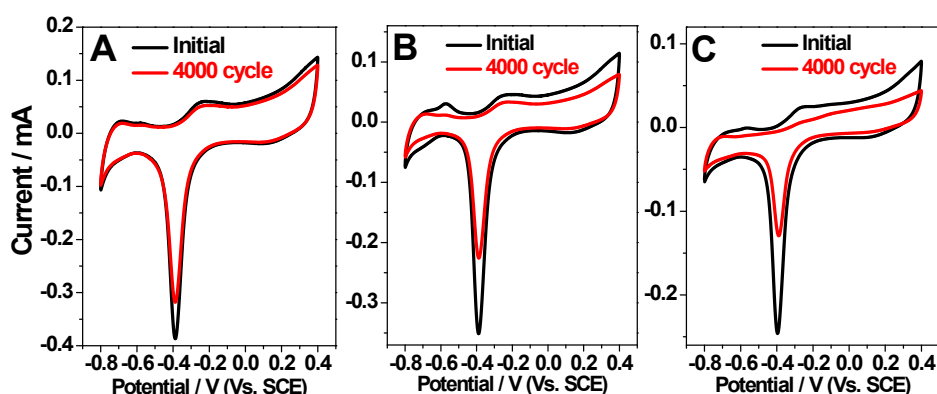

**Fig. S13.** CV curves for (A) Pd-NBs, (B) Pd-NCs and (C) Pd-SNPs in before and after 4000 cycles at a scan rate of  $100 \text{ mV s}^{-1}$ .

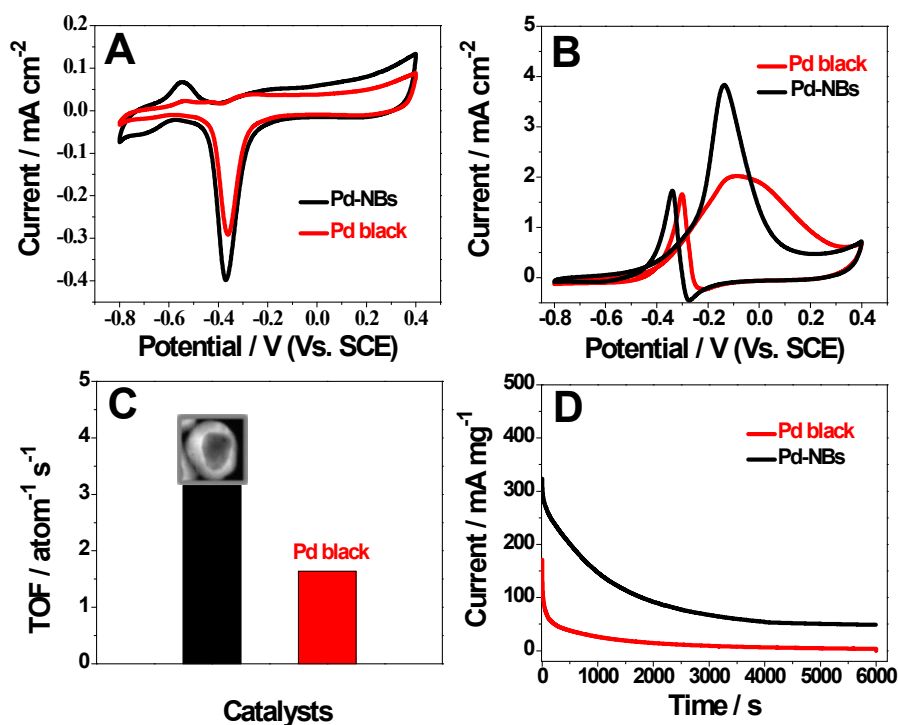

**Fig. S14** (A) Cyclic voltammograms of Pd-NBs and Pd black in  $\text{N}_2$ -saturated 0.1 M NaOH solution at a scan rate of  $50 \text{ mV s}^{-1}$ . (B) ESCA-normalized CVs for Pd-NBs and Pd black in  $\text{N}_2$ -saturated 0.1 M NaOH + 0.5 M  $\text{CH}_3\text{OH}$  solution at the scan rate of  $50 \text{ mV s}^{-1}$ . (C) The TOF of Pd-NBs and Pd black at  $-0.15 \text{ V}$  potential. (D) Chronoamperometry curves for Pd-NBs and Pd black in  $\text{N}_2$ -saturated 0.1 M NaOH + 0.5 M  $\text{CH}_3\text{OH}$  solution solution for 6000 s at  $-0.1 \text{ V}$  potential.

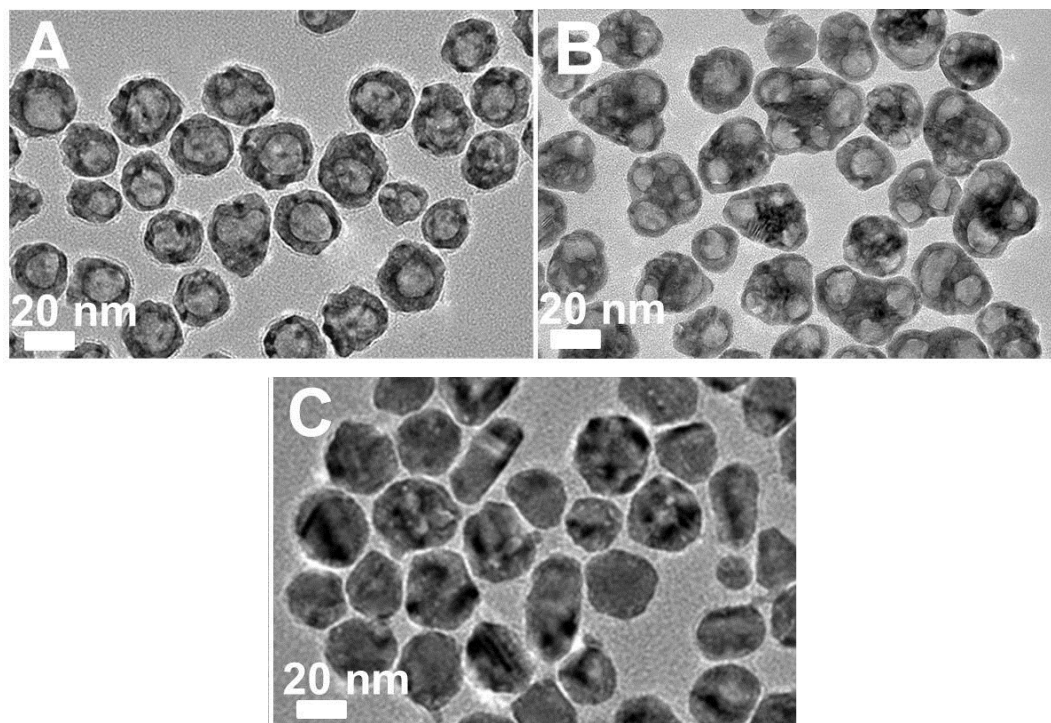

**Fig. S15** TEM images of (A) Pd-NBs, (B) Pd-NCs and (C) Pd-SNPs after 4 h of UV treatment.

## Reference

1. M. Crespo-Quesada, J. M. Andanson, A. Yarulin, B. Lim, Y. Xia and L. Kiwi-Minsker, *Langmuir*, 2011, **27** 7909–7916.
2. X. Xu, X. Zhang, H. Sun, Y. Yang, X. Dai, J. Gao, X. Li, P. Zhang, H. H. Wang and N. F. Yu, *Angew. Chem. Int. Edit.*, 2014, **126**, 12730–12735.
3. Z. C. Zhang, J. F. Hui, Z. C. Liu, X. Zhang, J. Zhuang and X. Wang, *Langmuir*, 2012, **28**, 14845–14848.
4. Z. Zhang, Y. Yang, F. Nosheen, P. Wang, J. Zhang, J. Zhuang and X. Wang, *Small*, 2013, **9**, 3063–3069.
